# Supplementary material for: Sharing-based social capital associated with harvest production and wealth in the Canadian Arctic
Source: PubMed Central journal article supplement (PMC5846769; doi:10.1371/journal.pone.0193759), 2018-03-12
Supplement: pone.0193759.s001.pdf [file pone.0193759.s001.pdf]

## S1 Table

Table 1: Description of the dataset provided in S1 Data.

| Column name | Description                                                                                                                                                                                                                                                                    |
|-------------|--------------------------------------------------------------------------------------------------------------------------------------------------------------------------------------------------------------------------------------------------------------------------------|
| ID          | Household ID number                                                                                                                                                                                                                                                            |
| Indegree    | Number of households from which the household receives country food                                                                                                                                                                                                            |
| Outdegree   | Number of households to which the household gives country food                                                                                                                                                                                                                 |
| Superin     | Number of super households from which the household receives country food                                                                                                                                                                                                      |
| Mutual      | Number of mutual (symmetric) ties each household has                                                                                                                                                                                                                           |
| Oneway      | Number of one-way incoming ties each household has                                                                                                                                                                                                                             |
| Density     | Density of the “in-neighborhood” of household’s sharing networks. Ties from the focal household are not considered in the calculation                                                                                                                                          |
| Huntcat     | (Factor 0/1/2) Household harvest production level (low/mid/super). Households that did not harvest any of four key species (ringed seal, beluga, caribou, and geese) are “low production;” households in the top 30 percentile of production are considered “super-households” |
| Allvehicles | The number of vehicles owned by the household, including cars/trucks, snowmobiles, fishing boats and freighter canoes, and all-terrain vehicles                                                                                                                                |
| HHsize      | Number of people living in the household. To protect the identity of respondents, this variable is provided after log-transformation and centering around the mean                                                                                                             |
| Maxage      | Age in years of the oldest member of the household. To protect the identity of respondents, this variable is provided after log-transformation and centering around the mean                                                                                                   |
| Singf       | (Factor 0/1) Whether the household is headed by a single woman                                                                                                                                                                                                                 |
| FMgive      | (Factor 0/1) Whether the household gave food away over the local radio in the 12 months preceding the survey                                                                                                                                                                   |
| Kinum       | Number of other households with siblings, parents, or children of HH members                                                                                                                                                                                                   |
