# Supplementary material for: Sharing-based social capital associated with harvest production and wealth in the Canadian Arctic
Source: PubMed Central journal article supplement (PMC5846769; doi:10.1371/journal.pone.0193759), 2018-03-12
Supplement: pone.0193759.s002.pdf [file pone.0193759.s002.pdf]

## S2 Table

Table 1: Posterior distributions for models of network social capital measures, with 2.5% and 97.5% quantiles

| Model term            | Network size |        |       | Network quality |        |        | Network density |         |         |
|-----------------------|--------------|--------|-------|-----------------|--------|--------|-----------------|---------|---------|
|                       | Mean         | 2.5%   | 97.5% | Mean            | 2.5%   | 97.5%  | Mean            | 2.5%    | 97.5%   |
| Intercept             | -0.098       | -0.285 | 0.088 | 0.422           | -0.115 | 0.966  | 0.015           | -0.016  | 0.047   |
| In-degree*            | N/A          | N/A    | N/A   | 2.473           | 1.897  | 3.054  | -0.139          | -0.173  | -0.106  |
| Out-degree*           | 0.230        | 0.083  | 0.375 | 0.290           | -0.158 | 0.740  | -0.013          | -0.039  | 0.013   |
| Low production†       | 0.056        | -0.226 | 0.337 | -0.017          | -0.831 | 0.805  | -0.017          | -0.064  | 0.030   |
| Mid production†       | -0.033       | -0.262 | 0.202 | -0.490          | -1.164 | 0.182  | -0.009          | -0.048  | 0.029   |
| Vehicles*             | 0.019        | -0.135 | 0.171 | -0.062          | -0.508 | 0.380  | 0.000           | -0.026  | 0.025   |
| Household size*       | 0.146        | -0.064 | 0.357 | -0.096          | -0.702 | 0.520  | 0.003           | -0.033  | 0.039   |
| Age oldest member*    | 0.929        | 0.584  | 1.272 | 0.598           | -0.528 | 1.726  | -0.044          | -0.110  | 0.022   |
| Single female headed† | 0.279        | 0.082  | 0.476 | -0.661          | -1.243 | -0.072 | -0.018          | -0.052  | 0.016   |
| FM giving†            | -0.051       | -0.238 | 0.134 | -0.047          | -0.585 | 0.496  | -0.008          | -0.040  | 0.023   |
| Close kin households* | 0.141        | -0.017 | 0.300 | -0.333          | -0.798 | 0.130  | 0.017           | -0.010  | 0.044   |
| $\tau$                | 5.753        | 4.255  | 7.455 | 0.687           | 0.510  | 0.892  | 205.938         | 152.193 | 267.608 |

\*denotes log-transformed variables,  $\log(x + 1)$ . Response variables were also log-transformed.

† denotes categorical (0/1) variables.
