# Supplementary material for: Sharing-based social capital associated with harvest production and wealth in the Canadian Arctic
Source: PubMed Central journal article supplement (PMC5846769; doi:10.1371/journal.pone.0193759), 2018-03-12
Supplement: pone.0193759.s003.pdf [file pone.0193759.s003.pdf]

### S3 Table

Table 1: Posterior distributions for regressions of one-way and mutual incoming sharing ties, with 2.5% and 97.5% quantiles

| Model term            | One-way in-degree |        |       | Mutual ties |        |       |
|-----------------------|-------------------|--------|-------|-------------|--------|-------|
|                       | Mean              | 2.5%   | 97.5% | Mean        | 2.5%   | 97.5% |
| Intercept             | -0.163            | -0.398 | 0.063 | -0.001      | -0.188 | 0.190 |
| Out-degree*           | -0.111            | -0.293 | 0.074 | 0.598       | 0.450  | 0.746 |
| Low production†       | 0.115             | -0.230 | 0.471 | -0.026      | -0.316 | 0.261 |
| Mid production†       | 0.087             | -0.198 | 0.379 | -0.092      | -0.330 | 0.141 |
| Vehicles*             | 0.066             | -0.125 | 0.256 | -0.037      | -0.192 | 0.118 |
| Household size*       | 0.142             | -0.118 | 0.403 | -0.045      | -0.258 | 0.167 |
| Age oldest member*    | 1.203             | 0.779  | 1.629 | 0.266       | -0.081 | 0.616 |
| Single female headed† | 0.270             | 0.030  | 0.512 | 0.140       | -0.054 | 0.338 |
| FM giving†            | -0.042            | -0.275 | 0.189 | -0.054      | -0.244 | 0.137 |
| Close kin households* | 0.125             | -0.071 | 0.320 | 0.070       | -0.092 | 0.230 |
| $\tau$                | 3.757             | 2.774  | 4.866 | 5.637       | 4.175  | 7.303 |

\*denotes log-transformed variables,  $\log(x + 1)$ . Response variables were also log-transformed.

† denotes categorical (0/1) variables.
