# Supplementary material for: Sharing-based social capital associated with harvest production and wealth in the Canadian Arctic
Source: PubMed Central journal article supplement (PMC5846769; doi:10.1371/journal.pone.0193759), 2018-03-12
Supplement: pone.0193759.s004.pdf [file pone.0193759.s004.pdf]

## S4 Table

Table 1: Posterior distributions for out-degree regression model, with 2.5% and 97.5% quantiles

| Model term             | Out-degree |        |        |
|------------------------|------------|--------|--------|
|                        | Mean       | 2.5%   | 97.5%  |
| Intercept              | 0.482      | 0.256  | 0.708  |
| Low production †       | -0.789     | -1.125 | -0.448 |
| Mid production †       | -0.456     | -0.749 | -0.160 |
| Vehicles*              | 0.363      | 0.169  | 0.557  |
| Household size*        | 0.016      | -0.266 | 0.298  |
| Age oldest member*     | -0.163     | -0.618 | 0.300  |
| Single female headed † | -0.114     | -0.370 | 0.141  |
| FM giving †            | 0.050      | -0.202 | 0.302  |
| Close kin households*  | 0.368      | 0.168  | 0.565  |
| $\tau$                 | 3.196      | 2.374  | 4.134  |

\*denotes log-transformed variables,  $\log(x + 1)$ . The response variable was also log-transformed.

† denotes categorical (0/1) variables.
