# Supplementary material for: Sharing-based social capital associated with harvest production and wealth in the Canadian Arctic
Source: PubMed Central journal article supplement (PMC5846769; doi:10.1371/journal.pone.0193759), 2018-03-12
Supplement: pone.0193759.s008.pdf [file pone.0193759.s008.pdf]

### S3 Figure

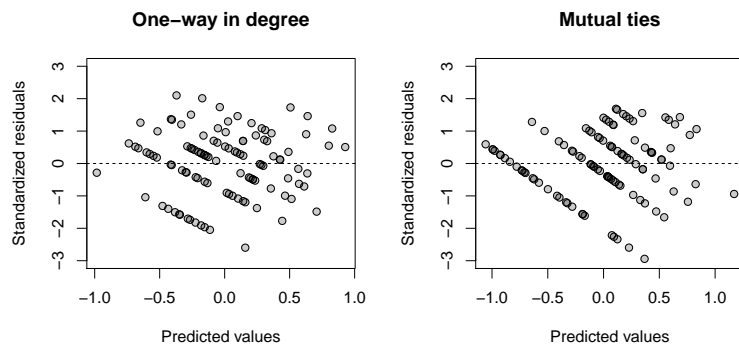

Figure 1: Mean residual plots for the models of one-way and reciprocal in-degree.
